# Supplementary material
Source: PubMed Central journal article supplement (PMC5497994)
Supplement: NIHMS871620-supplement.pdf [file NIHMS871620-supplement.pdf]

**Appendix**  
**Cut points for Clinical Muscle Weakness Among Older Americans**  
**Duchowny et al.**

**Appendix Table 1.** Cut points and Prevalence Estimates for Clinical Muscle Weakness by Race/Sex in the Health and Retirement Study (HRS) (Walking Speed <0.6 m/s)

| <b>HRS total sample (N=7,688)</b> |                                  |              |                                |              |                                  |              |                                |              |
|-----------------------------------|----------------------------------|--------------|--------------------------------|--------------|----------------------------------|--------------|--------------------------------|--------------|
| <b>Classification</b>             | <b>White males<br/>(n=2,799)</b> |              | <b>Black males<br/>(n=383)</b> |              | <b>White women<br/>(n=3,829)</b> |              | <b>Black women<br/>(n=675)</b> |              |
|                                   | <b>Cut point (kg)</b>            | <b>N (%)</b> | <b>Cut point (kg)</b>          | <b>N (%)</b> | <b>Cut point (kg)</b>            | <b>N (%)</b> | <b>Cut point (kg)</b>          | <b>N (%)</b> |
| Weak                              | <31                              | 675 (25)     | <39                            | 213 (58)     | <18                              | 792 (22)     | <25                            | 318 (50)     |
| Normal                            | ≥31                              | 2,075 (75)   | ≥39                            | 155 (42)     | ≥18                              | 2,887 (78)   | ≥25                            | 317 (50)     |

**Appendix**  
**Cut points for Clinical Muscle Weakness Among Older Americans**  
**Duchowny et al.**

**Appendix Table 2A.** Diagnostic Properties for Grip Strength Cut points in the Prediction of Slow Walking Speed in the Health and Retirement Study

| <b>Slow walking speed (&lt;0.8 m/s)</b> |       |       |       |             |                           |       |     |    |       |
|-----------------------------------------|-------|-------|-------|-------------|---------------------------|-------|-----|----|-------|
| White males (n=2,750)                   |       |       |       |             | Black males (n=368)       |       |     |    |       |
| <b>Slow walking speed</b>               |       |       |       |             | <b>Slow walking speed</b> |       |     |    |       |
| <b>Weak</b>                             |       | Yes   | No    | Total       | <b>Weak</b>               |       | Yes | No | Total |
|                                         | Yes   | 953   | 678   | 1,631       |                           | Yes   | 190 | 33 | 223   |
|                                         | No    | 315   | 804   | 1,119       |                           | No    | 84  | 61 | 145   |
|                                         | Total | 1,268 | 1,482 | 2,750       |                           | Total | 274 | 94 | 368   |
| Sensitivity                             | 75.16 |       |       | Sensitivity | 69.34                     |       |     |    |       |
| Specificity                             | 54.25 |       |       | Specificity | 64.89                     |       |     |    |       |
| White females (n=3,679)                 |       |       |       |             | Black females (n=635)     |       |     |    |       |
| <b>Slow walking speed</b>               |       |       |       |             | <b>Slow walking speed</b> |       |     |    |       |
| <b>Weak</b>                             |       | Yes   | No    | Total       | <b>Weak</b>               |       | Yes | No | Total |
|                                         | Yes   | 1,296 | 498   | 1,794       |                           | Yes   | 494 | 63 | 557   |
|                                         | No    | 847   | 1,038 | 1,885       |                           | No    | 52  | 26 | 78    |
|                                         | Total | 2,143 | 1,536 | 3,679       |                           | Total | 546 | 89 | 635   |
| Sensitivity                             | 60.48 |       |       | Sensitivity | 90.48                     |       |     |    |       |
| Specificity                             | 67.58 |       |       | Specificity | 29.21                     |       |     |    |       |

**Appendix**  
**Cut points for Clinical Muscle Weakness Among Older Americans**  
**Duchowny et al.**

**Appendix Table 2B.** Diagnostic Properties for Grip Strength Cut points in the Prediction of Activities of Daily Living (ADLs) in the Health and Retirement Study

| <b>Activities of daily living ( 0 vs. 1+)</b> |             |       |       |       |                        |             |       |     |       |
|-----------------------------------------------|-------------|-------|-------|-------|------------------------|-------------|-------|-----|-------|
| White males                                   |             |       |       |       | Black males            |             |       |     |       |
| <b>ADLs (1+ vs. 0)</b>                        |             |       |       |       | <b>ADLs (1+ vs. 0)</b> |             |       |     |       |
| <b>Weak</b>                                   |             | Yes   | No    | Total | <b>Weak</b>            |             | Yes   | No  | Total |
|                                               | Yes         | 288   | 1,343 | 1,631 |                        | Yes         | 45    | 178 | 223   |
|                                               | No          | 104   | 1,015 | 1,119 |                        | No          | 16    | 129 | 145   |
|                                               |             | 392   | 2,358 | 2,750 |                        |             | 61    | 307 | 368   |
|                                               | Sensitivity | 73.47 |       |       |                        | Sensitivity | 73.77 |     |       |
|                                               | Specificity | 43.04 |       |       |                        | Specificity | 42.02 |     |       |
| White females                                 |             |       |       |       | Black females          |             |       |     |       |
| <b>ADLs (1+ vs. 0)</b>                        |             |       |       |       | <b>ADLs (1+ vs. 0)</b> |             |       |     |       |
| <b>Weak</b>                                   |             | 1     | 0     | Total | <b>Weak</b>            |             | 1     | 0   | Total |
|                                               | Yes         | 400   | 1,394 | 1,794 |                        | Yes         | 159   | 398 | 557   |
|                                               | No          | 186   | 1,699 | 1,885 |                        | No          | 9     | 69  | 78    |
|                                               |             | 586   | 3,093 | 3,679 |                        |             | 168   | 467 | 635   |
|                                               | Sensitivity | 68.26 |       |       |                        | Sensitivity | 94.64 |     |       |
|                                               | Specificity | 54.93 |       |       |                        | Specificity | 14.78 |     |       |
